# Supplementary material for: Safety and tolerability of experimental hookworm infection in humans with metabolic disease: study protocol for a phase 1b randomised controlled clinical trial
Source: PubMed Central journal article supplement (PMC6907345; doi:10.1186/s12902-019-0461-5), 2019-12-11
Supplement: 12902_2019_461_MOESM4_ESM.pdf [file 12902_2019_461_MOESM4_ESM.pdf]

|                                                |                         |   |   |   |   |   |   |   |   |   |  |
|------------------------------------------------|-------------------------|---|---|---|---|---|---|---|---|---|--|
| <b>CASE REPORT FORM<br/>WAM Clinical Trial</b> | <b>Visit Date</b>       |   |   |   |   |   |   |   |   |   |  |
|                                                |                         | D | D | M | M | M | Y | Y | Y | Y |  |
| <b>Visit 1 Week -6</b>                         | <b>Trial Identifier</b> |   |   |   |   |   |   |   |   |   |  |

## CONSENT

**Date of Informed Consent:**

|  |  |     |
|--|--|-----|
|  |  | day |
|--|--|-----|

|  |  |  |       |
|--|--|--|-------|
|  |  |  | month |
|--|--|--|-------|

|   |   |   |  |      |
|---|---|---|--|------|
| 2 | 0 | 1 |  | year |
|---|---|---|--|------|

**IMPORTANT:** Informed consent must be obtained from the participant before study procedures are started.

### PARTICIPANT INFORMATION:

FIRST NAME:

MIDDLE NAME:

LAST NAME:

ADDRESS:

PHONE:

EMAIL:

OCCUPATION:

PRIMARY CARE PHYSICIAN:

ADDRESS:

Date of Birth: 

|  |  |     |
|--|--|-----|
|  |  | day |
|--|--|-----|

|  |  |  |       |
|--|--|--|-------|
|  |  |  | month |
|--|--|--|-------|

|  |  |  |  |      |
|--|--|--|--|------|
|  |  |  |  | year |
|--|--|--|--|------|

Age (years) 

|  |  |
|--|--|
|  |  |
|--|--|

GENDER 

|  |  |  |           |
|--|--|--|-----------|
|  |  |  | M / F / O |
|--|--|--|-----------|

### INDIGENOUS STATUS: (Tick ONE box only)

- ABORIGINAL but not Torres Strait Islander origin
- TORRES STRAIT ISLANDER but not Aboriginal origin
- BOTH Aboriginal and Torres Strait Islander origin
- NEITHER Aboriginal or Torres Strait Islander origin
- NOT STATED / UNKNOWN / OTHER (PLEASE SPECIFY)

Waist Circumference (cm) 

|  |  |  |
|--|--|--|
|  |  |  |
|--|--|--|

Height (cm): 

|  |  |  |
|--|--|--|
|  |  |  |
|--|--|--|

Weight (kg): 

|  |  |  |
|--|--|--|
|  |  |  |
|--|--|--|

**BMI**

|  |  |
|--|--|
|  |  |
|--|--|



|                                                |                         |   |   |   |   |   |   |   |   |   |  |
|------------------------------------------------|-------------------------|---|---|---|---|---|---|---|---|---|--|
| <b>CASE REPORT FORM<br/>WAM Clinical Trial</b> | <b>Visit Date</b>       |   |   |   |   |   |   |   |   |   |  |
|                                                |                         | D | D | M | M | M | Y | Y | Y | Y |  |
| <b>Visit 1 Week -6</b>                         | <b>Trial Identifier</b> |   |   |   |   |   |   |   |   |   |  |

**SMOKING:**

|                                                                                 |                                                          |                          |
|---------------------------------------------------------------------------------|----------------------------------------------------------|--------------------------|
|                                                                                 | <b>No</b>                                                | <b>Yes</b>               |
| <b>Are you a current smoker?</b> (Tick ONE box only)                            | <input type="checkbox"/>                                 | <input type="checkbox"/> |
| > 100 cigarettes in their lifetime and has smoked within 28 days                |                                                          |                          |
| <br>If YES, How many cigarettes per day do you smoke?                           | <input style="width: 100px; height: 20px;" type="text"/> |                          |
|                                                                                 | <b>No</b>                                                | <b>Yes</b>               |
| <b>If NO, Have you ever smoked?</b> (Tick ONE box only)                         | <input type="checkbox"/>                                 | <input type="checkbox"/> |
| > 28 days duration, previously having smoked > 100 cigarettes in their lifetime |                                                          |                          |

**ALCOHOL:**

|                                         |                          |                          |
|-----------------------------------------|--------------------------|--------------------------|
|                                         | <b>No</b>                | <b>Yes</b>               |
|                                         | <input type="checkbox"/> | <input type="checkbox"/> |
| Estimated units per week .....          |                          |                          |
| .....                                   |                          |                          |
| .....                                   |                          |                          |
|                                         | <b>No</b>                | <b>Yes</b>               |
| Ever sought help for alcohol addiction? | <input type="checkbox"/> | <input type="checkbox"/> |

**ILLICIT SUBSTANCES:**

|          |                          |                          |
|----------|--------------------------|--------------------------|
|          | <b>No</b>                | <b>Yes</b>               |
|          | <input type="checkbox"/> | <input type="checkbox"/> |
| Specify: |                          |                          |
| .....    |                          |                          |
| .....    |                          |                          |
| .....    |                          |                          |
| .....    |                          |                          |
