# Supplementary material for: Safety and tolerability of experimental hookworm infection in humans with metabolic disease: study protocol for a phase 1b randomised controlled clinical trial
Source: Springer Nature journal article supplement (doi:10.1186/s12902-019-0461-5), 2019-12-01
Supplement: MOESM2 [file 17496558]

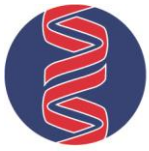

**PATIENT IDENTIFICATION**

|  |  |  |
|--|--|--|
|  |  |  |
|--|--|--|

**SUBJECT INITIALS**

|  |  |  |
|--|--|--|
|  |  |  |
|--|--|--|

**SUBJECT NUMBER**

**SEX**

**DATE OF BIRTH**

**ADDRESS**

Hookworm Infection Study, James Cook University, Cairns 4870

**TESTS REQUESTED**

**SCREENING**

|                                                     |      |
|-----------------------------------------------------|------|
| Fasting Blood Glucose                               | FPG  |
| Fasting Insulin                                     | IN   |
| CHDL ( <i>Cholesterol, Triglyceride, HDL, LDL</i> ) | CHDL |
| Liver Function Test                                 | LFT  |

Is patient fasting?  Yes  No

Date of Collection:  /  /   
DD / MMM / YYYY

Time of Collection:  :   
24hr clock

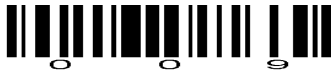

**SULLIVAN NICOLAIDES PTY LTD ACN 078 202 196**  
**APA**

*24 Hurworth Street Bowen Hills 4006*

**COPY REPORTS TO**

SNP Clinical Trials Manager

**REFERRER**

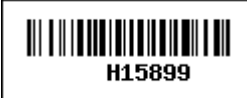

Trial Coordinator

**H15899**  
**B7052**

**ACCOUNT NAME**

Hookworm Infection Study

|                       |                          |                    |                     |                    |                    |                    |
|-----------------------|--------------------------|--------------------|---------------------|--------------------|--------------------|--------------------|
| <b>COLL INIT</b><br>U | <b>LOC CODE</b><br>BR400 | <b>SST</b><br>Tube | <b>EDTA</b><br>Tube | <b>LIH</b><br>Tube | <b>CIT</b><br>Tube | <b>PPT</b><br>Tube |
|                       |                          | <b>ACD</b>         | <b>Vacu</b>         | <b>Rand</b>        | <b>Jar</b>         | <b>Histo</b>       |
|                       |                          | Tube               | Tube                | Urine              | Other              |                    |
| <b>COLL CODE</b><br>D | <b>PAY CAT</b><br>HOOKS  | <b>Pap</b>         | <b>ThP</b>          | <b>Chlam</b>       | <b>Trans</b>       | <b>Plain</b>       |
|                       |                          | Slide              | ThinPrep            | Swab               | Red swab           | Black wab          |
|                       |                          | <b>Unspun</b>      | <b>Frozen</b>       | <b>Card</b>        | <b>Other</b>       |                    |

\*\*\*Attention Collection Staff\*\*\*

1. Collect **1 x 8.5ml SST Vacutainer**. Gently invert x 5.
2. Centrifuge SST.
3. Transport all specimens to SNP Bowen Hills.
